# Supplementary material
Source: PubMed Central journal article supplement (PMC6842104)
Supplement: NIHMS1534588-supplement-1.pdf [file NIHMS1534588-supplement-1.pdf]

# **Serotonin Transporter Binding Potentials in Brain of Juvenile Monkeys One Year After Discontinuation of a Two-Year Treatment With Fluoxetine**

## **SUPPLEMENTARY INFORMATION**

### **Table of Contents**

List of acronyms in text...page 2

Table S1. Technical details for PET and MRI scans....page 3

Figure S1. Plasma fluoxetine compared to children's therapeutic doses...page 4

Table S2. MAOA\*fluoxetine interactions in behavioral data recorded during fluoxetine dosing...page 5

Description of Picture Elicited Emotional Response test ...page 6-7

**List of acronyms in text**

3DRP—3 dimensional reprojection  
5HT--serotonin  
5HTTLPR--serotonin transporter gene polymorphism  
ADHD -attention deficit hyperactivity disorder  
ANOVA--analysis of variance  
ANS --advanced normalization tools  
ASD-autism spectrum disorder  
BBA--BioBehavioral Assessment  
Beta CIT--Iodine-123-beta-carbomethoxy-3 beta-(4-iodophenyltropane)  
BP--binding potential  
CNPRC--California National Primate Research Center  
DA--dopamine  
DASB--3-amino-4-(2-dimethylaminomethylphenylsulfanyl)-benzonitrile  
FDR--false detection rate  
FSPGR-- fast spoiled gradient echo  
GBq--gigabequerel  
LL/SL/SS --allele based genotypes for 5HTTLPR; L=long, S=short variant allele  
MAO—monoamine oxidase  
MAOA---isoform of MAO  
MAOB--isoform of MAO  
MBq--megabecquerel  
MRI--magnetic resonance imaging  
NE--norepinephrine  
PET--positron emission tomography  
ROI--region of interest  
SERT-serotonin transporter  
SRTM-s-imple reference tissue model  
SSRI--selective serotonin reuptake inhibitor  
UCDavis--University of California Davis  
uVNTR—upstream variable number of tandem repeats

Table S1. Technical details for PET and MRI scans

|                                  |                                |                                                   |
|----------------------------------|--------------------------------|---------------------------------------------------|
| [ <sup>11</sup> C]DASB synthesis | Cyclotron                      | Siemens RDS111                                    |
|                                  | Synthesis software             | Tracerlab FXC Pro automated synthesis module (GE) |
|                                  | Purity                         | >95%                                              |
|                                  | Specific activity EOS          | 48.5 to 273 Ci/ $\mu$ mol                         |
|                                  | Specific activity at injection | 22.9 to 117 Ci/ $\mu$ mol                         |
| PET scanning                     | Scanner                        | Siemens Primate 4 (P4) microPET system            |
|                                  | Spatial resolution             | 1.8 mm                                            |
|                                  | Duration                       | 90 min                                            |
|                                  | Ketamine-scan interval         | 70 min                                            |
| PET analysis                     | software                       | PMOD 3.802                                        |
|                                  | BP measurement                 | Logan reference method                            |
| MRI scanning                     | Scanner                        | GE 1.5T Signa HDx 16.0 scanner                    |
|                                  | Coil                           | HD TRknee PA                                      |
|                                  | Sequence                       | T1 3D FSPGR                                       |
|                                  | FOV                            | 16 cm                                             |
|                                  | TR                             | 6.8 msec                                          |
|                                  | TE                             | 3.3 msec                                          |
|                                  | ET                             | 1 msec                                            |
|                                  | FA                             | 12                                                |
|                                  | Slice thickness                | 1mm                                               |
|                                  | Slice spacing                  | -0.5mm                                            |
|                                  | NEX                            | 4                                                 |
|                                  | RBw                            | 31.25 Hz                                          |
| MRI ROI mapping                  | Atlas                          | Paxinos                                           |
|                                  | Template alignment             | ANTS                                              |
|                                  | Transformation model           | SyN, stepsize 0.10                                |

FSPGR - fast spoiled gradient echo

FOV - field of view

TR - repetition time

TE - echo time

ANTS – advanced normalization tools

FA - flip angle

NEX - number of excitations

RBw - receive bandwidth

ET - echo-train

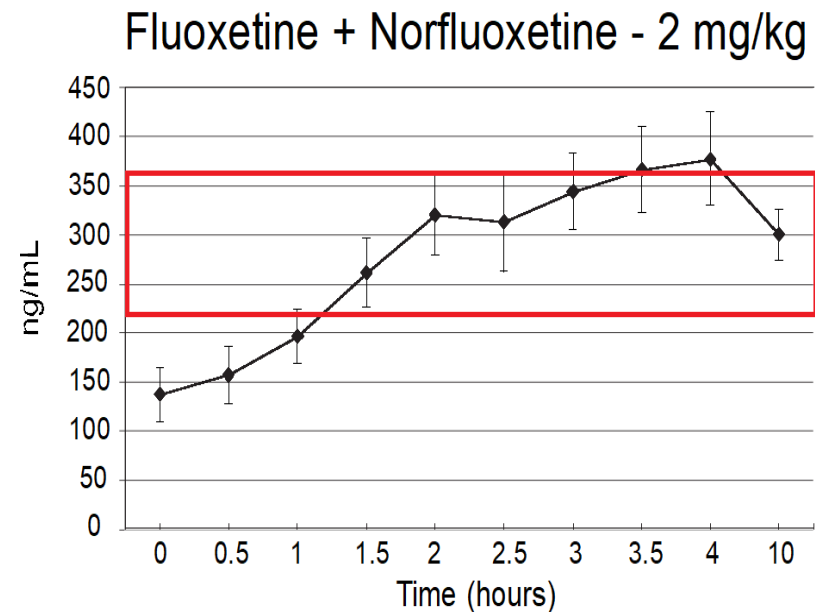

Figure S1. Time course of active agent (fluoxetine + norfluoxetine) after a single oral administration of 2 mg/kg fluoxetine to juvenile male rhesus. Data from a preliminary pharmacokinetic study<sup>1</sup>. Red lines indicate range of active agent in children 6-11 years of age monitored during treatment with fluoxetine<sup>2</sup>. In children, a 2 mg/kg/d dose would be achieved with a 40 mg/day dose of fluoxetine in a 6 y.o. boy or an 80 mg/day dose in an 11 y.o. boy. Plasma levels at the end of dosing in the main study were 273±31 ng/ml. Similar levels of active agent have been reported at this dose in adult rhesus<sup>3</sup>.

<sup>1</sup>Golub MS, Hogrefe CE. Fluoxetine: juvenile pharmacokinetics in a nonhuman primate model. *Psychopharmacology (Berl)*. 2014 Oct;231(20):4041-7.

<sup>2</sup>Wilens TE, Cohen L, Biederman J, Abrams A, Neft D, Faid N, Sinha V. Fluoxetine pharmacokinetics in pediatric patients. *J Clin Psychopharmacol* 2002 22:568–575.

<sup>3</sup>Fontenot MB, Musso MW, McFatter RM, Anderson GM. Dose-finding study of fluoxetine and venlafaxine for the treatment of self-injurious and stereotypic behavior in rhesus macaques (*Macaca mulatta*). *J Am Assoc Lab Anim Sci*. 2009 48(2):176-84.

Table S2. Fluoxetine interactions with MAOA genotype during dosing.

| Domain                         | Fluoxetine*MAOA genotype interaction                                                                                               | Reference |
|--------------------------------|------------------------------------------------------------------------------------------------------------------------------------|-----------|
| Activity & Sleep               | Fluoxetine increase in sleep fragmentation was greater in the high-MAOA subjects.                                                  | (1)       |
| Social Interaction             | In the fluoxetine group, more behavior invitations and initiations were seen in the high-MAOA subjects than the low-MAOA subjects. | (2)       |
| Emotional Response to Pictures | Fluoxetine decreased emotional response in the low-MAOA group.                                                                     | (3)       |
| Short Term Memory test         | Fluoxetine decreased the number of trial initiations in the high-MAOA group.                                                       | (4)       |

1. Golub MS, Hogrefe CE (2016): Sleep disturbance as detected by actigraphy in pre-pubertal juvenile monkeys receiving therapeutic doses of fluoxetine. *Neurotoxicol Teratol*, 55: 1-7.
2. Golub MS, Hogrefe CE, Bulleri AM (2016): Peer social interaction is facilitated in juvenile rhesus monkeys treated with fluoxetine. *Neuropharmacology*, 105: 553-560.
3. Golub MS, Hogrefe CE, Bulleri AM (2016): Regulation of emotional response in juvenile monkeys treated with fluoxetine: MAOA interactions. *Eur Neuropsychopharmacol*, 26(12): 1920-1929.
4. Golub MS, Hackett EP, Hogrefe CE, Leranath C, Elsworth JD, Roth RH (2017): Cognitive performance of juvenile monkeys after chronic fluoxetine treatment. *Dev Cogn Neurosci*, 26: 52-61.

### **Picture-elicited Emotional Response protocol**

(from Golub MS, Hogrefe CE, Bulleri AM (2016): Regulation of emotional response in juvenile monkeys treated with fluoxetine: MAOA interactions. *Eur Neuropsychopharmacol*, 26(12): 1920-1929.)

Emotional responsiveness to pictures with varying affective content was assessed one year after the conclusion of dosing (four years of age). A series of eight pictures were presented on a monitor via a PowerPoint slide show. Animals were transferred to a familiar test cage with a clear plexiglass front and placed approximately 40 cm away from the video monitor in a darkened room. A video camera and light placed above the monitor recorded the session for later coding of behavior. Each slide was presented for 30 s followed by a 1 min interslide interval of a black screen. Behavior was coded during the slide presentations. The eight slides were: a plain light green colored slide; fruit (apple slice and half peeled banana); a snake; a cage (identical to the home cage); an adult male monkey with an open mouth stare; a mother and infant monkey; two monkeys grooming; and a technician dressed in protective clothing wearing leather gauntlet/hand catching gloves.

Videos were scored with The Observer (Noldus Information Technology, Wageningen, The Netherlands) using an ethogram that with a number of expressive behaviors including facial expressions, vocalizations and simple behaviors known to reflect emotional response in rhesus. All videos were scored blind by the same observer (AMB), with an average intra-observer reliability of 89%.

**Pictures**

| <i>Picture #</i> | <i>Code</i> | <i>Definition</i>          |
|------------------|-------------|----------------------------|
| 1                | p1          | Two monkeys grooming       |
| 2                | p2          | Aggressive monkey in tree  |
| 3                | p3          | Green control blank        |
| 4                | p4          | Banana and apple           |
| 5                | p5          | Snake                      |
| 6                | p6          | Mother with nursing infant |
| 7                | p7          | Cage                       |

## Ethogram used to score videotapes

| <i>Behavior</i> | <i>Code</i> | <i>Definition</i>                                                                     |
|-----------------|-------------|---------------------------------------------------------------------------------------|
| Fear Grimace    | fg          | A wide “smile” or grin with the teeth showing                                         |
| Crouch          | cr          | Chest is near the ground, limbs are flexed, head is below the shoulders               |
| Lipsmack        | lp          | Rapid movement of pursed lips, usually accompanied by a “kissing” or smacking sound   |
| Threat          | th          | One or more of the following: open mouth stare, head bob, ear flap, cage shake, lunge |
| Grunt           | gt          | Soft, guttural, bubbly vocalization, generally affiliative in nature                  |
| Bark            | br          | Gruff, low-pitched vocalization                                                       |
| Scream          | sm          | Loud, high-pitched shrieking distress vocalization                                    |
| Coo             | co          | Medium pitched, clear call                                                            |
| Yawn            | ya          | Self explanatory                                                                      |
| Scratch         | sc          | Self explanatory                                                                      |
| Convulsive jerk | cj          | Sudden whole body shaking or convulsive contractions                                  |
| Self clasp      | cl          | Placing a hand or foot on another limb or fur                                         |
| Cage shake      | cs          | Shaking cage or moving/displacing the test box                                        |
| Other           | ot          | Any special situation that should be recorded                                         |
| Tooth grind     | tg          | Loud gnashing of teeth                                                                |
| Rump present    | rp          | Animal stands still, lifts tail and presents rump to observer or other animal         |
| Self groom      | gr          | Animal grooming self                                                                  |
| Self inspect    | si          | Animal touching genitals                                                              |
